# Supplementary material for: Self-reported practices among traditional birth attendants surveyed in western Kenya: a descriptive study
Source: PubMed Central journal article supplement (PMC4981994; doi:10.1186/s12884-016-1007-8), 2016-08-12
Supplement: 12884_2016_1007_MOESM2_ESM.pdf [file 12884_2016_1007_MOESM2_ESM.pdf]

```

FREQUENCIES VARIABLES=GNCluster HBBTrainInt HBBTrainRef Gloves CordAlcohol Cor
dGV CordOther CordOtherDes Mouth2Mouth TradRXEver TradRXObsLabor TradRxPlacent
a TradRxBleed TradRxFever TradRxOther TradRxOtherText PayforTBA TBAPayKSH KSHC
ost TBAPayBarter
TBAPayOther PlacManual PlacMassage PlacOxytocin PlacRefer PlacOther PlacOtherT
ext Report2Elder ReferObsLabor ReferProLabor ReferBleed ReferRetainPlac ReferC
ordProlapse ReferPreterm ReferNoFetalHR ReferMomBP ReferMomSeize ReferBreech R
eferBabyAsphy
ReferOther ReferOtherDesc HCFriendly HCCommunicate HCFamInteract
/ORDER=ANALYSIS.

```

## Frequencies

[DataSet1] C:\Documents and Settings\shbucher\Desktop\Old PC\shbucher\Global Network Kenya-specific research\TBA survey\SPSS data analysis\CLEAN\_Kenya only CBA survey data.sav

**Statistics**

|   |         | GNCluster | Receive HBB initial training? | Receive HBB refresher training? | Do you have gloves? | Apply alcohol to cord |
|---|---------|-----------|-------------------------------|---------------------------------|---------------------|-----------------------|
| N | Valid   | 101       | 101                           | 101                             | 101                 | 101                   |
|   | Missing | 0         | 0                             | 0                               | 0                   | 0                     |

**Statistics**

|   |         | Apply gentian violet to cord | Other reported cord care | Description | Have you used mouth to mouth to resuscitate a baby? | Ever used TradRx/herbs for pregnant/laboring moms? |
|---|---------|------------------------------|--------------------------|-------------|-----------------------------------------------------|----------------------------------------------------|
| N | Valid   | 101                          | 101                      | 101         | 101                                                 | 101                                                |
|   | Missing | 0                            | 0                        | 0           | 0                                                   | 0                                                  |

**Statistics**

|   |         | Used TradRx/herbs for obs/prolonged labor. | Used TradRx/herbs for retained placenta | Used TradRx/herbs for bleeding | Used TradRx/herbs for fever | Other reported use of TradRx/herbs |
|---|---------|--------------------------------------------|-----------------------------------------|--------------------------------|-----------------------------|------------------------------------|
| N | Valid   | 101                                        | 101                                     | 101                            | 101                         | 101                                |
|   | Missing | 0                                          | 0                                       | 0                              | 0                           | 0                                  |

**Statistics**

|   |         | Description of other herb use | Do you charge for TBA services? | TBA charges in shillings | Average TBA charge in KSH | Accept barter for TBA services? |
|---|---------|-------------------------------|---------------------------------|--------------------------|---------------------------|---------------------------------|
| N | Valid   | 101                           | 101                             | 101                      | 100                       | 101                             |
|   | Missing | 0                             | 0                               | 0                        | 1                         | 0                               |

**Statistics**

|   |         | Other reported ways to pay for TBA services | Manage retained placenta: manual extraction | Manage retained placenta: uterine massage | Manage retained placenta: Oxytocin | Manage retained placenta: refer to health facility |
|---|---------|---------------------------------------------|---------------------------------------------|-------------------------------------------|------------------------------------|----------------------------------------------------|
| N | Valid   | 101                                         | 101                                         | 101                                       | 101                                | 101                                                |
|   | Missing | 0                                           | 0                                           | 0                                         | 0                                  | 0                                                  |

**Statistics**

|   |         | Manage retained placenta: other reported | Other methods manage retained placenta | Report outcomes to elder/chief? | Ever referred to health facility for obstructed labor | Ever referred to health facility for prolonged labor |
|---|---------|------------------------------------------|----------------------------------------|---------------------------------|-------------------------------------------------------|------------------------------------------------------|
| N | Valid   | 101                                      | 101                                    | 101                             | 101                                                   | 101                                                  |
|   | Missing | 0                                        | 0                                      | 0                               | 0                                                     | 0                                                    |

**Statistics**

|   |         | Ever referred to health facility for bleeding | Ever referred to health facility for retained placenta | Ever referred to health facility for prolapsed cord | Ever referred to health facility for prematurity | Ever referred to health facility for no fetal heart rate |
|---|---------|-----------------------------------------------|--------------------------------------------------------|-----------------------------------------------------|--------------------------------------------------|----------------------------------------------------------|
| N | Valid   | 101                                           | 101                                                    | 101                                                 | 101                                              | 101                                                      |
|   | Missing | 0                                             | 0                                                      | 0                                                   | 0                                                | 0                                                        |

**Statistics**

|   |         | Ever referred to health facility for mom hypertension | Ever referred to health facility for mom seizures | Ever referred to health facility for breech | Ever refer to health facility for baby not breathe | Ever refer for other conditions |
|---|---------|-------------------------------------------------------|---------------------------------------------------|---------------------------------------------|----------------------------------------------------|---------------------------------|
| N | Valid   | 101                                                   | 101                                               | 101                                         | 101                                                | 101                             |
|   | Missing | 0                                                     | 0                                                 | 0                                           | 0                                                  | 0                               |

**Statistics**

|   |         | Other reported referral conditions | HCFriendly | HCCommunicate | HCFamInteract |
|---|---------|------------------------------------|------------|---------------|---------------|
| N | Valid   | 101                                | 100        | 101           | 101           |
|   | Missing | 0                                  | 1          | 0             | 0             |

**Frequency Table**

**GNCluster**

|       |           | Frequency | Percent | Valid Percent | Cumulative Percent |  |
|-------|-----------|-----------|---------|---------------|--------------------|--|
| Valid | Alupe     | 6         | 5.9     | 5.9           | 5.9                |  |
|       | Makunga   | 7         | 6.9     | 6.9           | 12.9               |  |
|       | Matayos   | 6         | 5.9     | 5.9           | 18.8               |  |
|       | Moding    | 6         | 5.9     | 5.9           | 24.8               |  |
|       | Mumias    | 6         | 5.9     | 5.9           | 30.7               |  |
|       | Nambale   | 6         | 5.9     | 5.9           | 36.6               |  |
|       | Nasewa    | 5         | 5.0     | 5.0           | 41.6               |  |
|       | Sirisia   | 6         | 5.9     | 5.9           | 47.5               |  |
|       | Amukura   | 7         | 6.9     | 6.9           | 54.5               |  |
|       | Bokoli    | 4         | 4.0     | 4.0           | 58.4               |  |
|       | Bumula    | 7         | 6.9     | 6.9           | 65.3               |  |
|       | Bumala B  | 6         | 5.9     | 5.9           | 71.3               |  |
|       | Chwele    | 7         | 6.9     | 6.9           | 78.2               |  |
|       | Khunyangu | 7         | 6.9     | 6.9           | 85.1               |  |
|       | Kocholia  | 7         | 6.9     | 6.9           | 92.1               |  |
|       | Lukolis   | 6         | 5.9     | 5.9           | 98.0               |  |
|       | Naswea    | 1         | 1.0     | 1.0           | 99.0               |  |
|       | Unknown   | 1         | 1.0     | 1.0           | 100.0              |  |
|       | Total     |           | 101     | 100.0         | 100.0              |  |

**Receive HBB initial training?**

|       |         | Frequency | Percent | Valid Percent | Cumulative Percent |
|-------|---------|-----------|---------|---------------|--------------------|
| Valid | No      | 77        | 76.2    | 76.2          | 76.2               |
|       | Yes     | 23        | 22.8    | 22.8          | 99.0               |
|       | Missing | 1         | 1.0     | 1.0           | 100.0              |
|       | Total   | 101       | 100.0   | 100.0         |                    |

**Receive HBB refresher training?**

|       |         | Frequency | Percent | Valid Percent | Cumulative Percent |
|-------|---------|-----------|---------|---------------|--------------------|
| Valid | No      | 98        | 97.0    | 97.0          | 97.0               |
|       | Yes     | 2         | 2.0     | 2.0           | 99.0               |
|       | Missing | 1         | 1.0     | 1.0           | 100.0              |
|       | Total   | 101       | 100.0   | 100.0         |                    |

**Do you have gloves?**

|       |       | Frequency | Percent | Valid Percent | Cumulative Percent |
|-------|-------|-----------|---------|---------------|--------------------|
| Valid | No    | 3         | 3.0     | 3.0           | 3.0                |
|       | Yes   | 98        | 97.0    | 97.0          | 100.0              |
|       | Total | 101       | 100.0   | 100.0         |                    |

**Apply alcohol to cord**

|       |         | Frequency | Percent | Valid Percent | Cumulative Percent |
|-------|---------|-----------|---------|---------------|--------------------|
| Valid | No      | 99        | 98.0    | 98.0          | 98.0               |
|       | Missing | 2         | 2.0     | 2.0           | 100.0              |
|       | Total   | 101       | 100.0   | 100.0         |                    |

**Apply gentian violet to cord**

|       |         | Frequency | Percent | Valid Percent | Cumulative Percent |
|-------|---------|-----------|---------|---------------|--------------------|
| Valid | No      | 99        | 98.0    | 98.0          | 98.0               |
|       | Missing | 2         | 2.0     | 2.0           | 100.0              |
|       | Total   | 101       | 100.0   | 100.0         |                    |

**Other reported cord care**

|       |         | Frequency | Percent | Valid Percent | Cumulative Percent |
|-------|---------|-----------|---------|---------------|--------------------|
| Valid | No      | 46        | 45.5    | 45.5          | 45.5               |
|       | Yes     | 53        | 52.5    | 52.5          | 98.0               |
|       | Missing | 2         | 2.0     | 2.0           | 100.0              |
|       | Total   | 101       | 100.0   | 100.0         |                    |

**Description**

|       |              | Frequency | Percent | Valid Percent | Cumulative Percent |
|-------|--------------|-----------|---------|---------------|--------------------|
| Valid | Jik (bleach) | 1         | 1.0     | 1.0           | 1.0                |
|       | Missing      | 2         | 2.0     | 2.0           | 3.0                |
|       | Nothing      | 44        | 43.6    | 43.6          | 46.5               |
|       | Oil          | 2         | 2.0     | 2.0           | 48.5               |
|       | Powder       | 15        | 14.9    | 14.9          | 63.4               |
|       | Powder, Oil  | 2         | 2.0     | 2.0           | 65.3               |
|       | Spirit       | 35        | 34.7    | 34.7          | 100.0              |
|       | Total        | 101       | 100.0   | 100.0         |                    |

**Have you used mouth to mouth to resuscitate a baby?**

|       |         | Frequency | Percent | Valid Percent | Cumulative Percent |
|-------|---------|-----------|---------|---------------|--------------------|
| Valid | No      | 65        | 64.4    | 64.4          | 64.4               |
|       | Yes     | 23        | 22.8    | 22.8          | 87.1               |
|       | Missing | 13        | 12.9    | 12.9          | 100.0              |
|       | Total   | 101       | 100.0   | 100.0         |                    |

**Ever used TradRx/herbs for pregnant/laboring moms?**

|       |       | Frequency | Percent | Valid Percent | Cumulative Percent |
|-------|-------|-----------|---------|---------------|--------------------|
| Valid | No    | 82        | 81.2    | 81.2          | 81.2               |
|       | Yes   | 19        | 18.8    | 18.8          | 100.0              |
|       | Total | 101       | 100.0   | 100.0         |                    |

**Used TradRx/herbs for obs/prolonged labor.**

|       |         | Frequency | Percent | Valid Percent | Cumulative Percent |
|-------|---------|-----------|---------|---------------|--------------------|
| Valid | No      | 89        | 88.1    | 88.1          | 88.1               |
|       | Yes     | 2         | 2.0     | 2.0           | 90.1               |
|       | Missing | 10        | 9.9     | 9.9           | 100.0              |
|       | Total   | 101       | 100.0   | 100.0         |                    |

**Used TradRx/herbs for retained placenta**

|       |         | Frequency | Percent | Valid Percent | Cumulative Percent |
|-------|---------|-----------|---------|---------------|--------------------|
| Valid | No      | 86        | 85.1    | 85.1          | 85.1               |
|       | Yes     | 9         | 8.9     | 8.9           | 94.1               |
|       | Missing | 6         | 5.9     | 5.9           | 100.0              |
|       | Total   | 101       | 100.0   | 100.0         |                    |

**Used TradRx/herbs for bleeding**

|       |         | Frequency | Percent | Valid Percent | Cumulative Percent |
|-------|---------|-----------|---------|---------------|--------------------|
| Valid | No      | 88        | 87.1    | 87.1          | 87.1               |
|       | Yes     | 3         | 3.0     | 3.0           | 90.1               |
|       | Missing | 10        | 9.9     | 9.9           | 100.0              |
|       | Total   | 101       | 100.0   | 100.0         |                    |

**Used TradRx/herbs for fever**

|       |         | Frequency | Percent | Valid Percent | Cumulative Percent |
|-------|---------|-----------|---------|---------------|--------------------|
| Valid | No      | 90        | 89.1    | 89.1          | 89.1               |
|       | Yes     | 1         | 1.0     | 1.0           | 90.1               |
|       | Missing | 10        | 9.9     | 9.9           | 100.0              |
|       | Total   | 101       | 100.0   | 100.0         |                    |

**Other reported use of TradRx/herbs**

|       |         | Frequency | Percent | Valid Percent | Cumulative Percent |
|-------|---------|-----------|---------|---------------|--------------------|
| Valid | No      | 90        | 89.1    | 89.1          | 89.1               |
|       | Yes     | 1         | 1.0     | 1.0           | 90.1               |
|       | Missing | 10        | 9.9     | 9.9           | 100.0              |
|       | Total   | 101       | 100.0   | 100.0         |                    |

**Description of other herb use**

|       |                  | Frequency | Percent | Valid Percent | Cumulative Percent |
|-------|------------------|-----------|---------|---------------|--------------------|
| Valid |                  | 100       | 99.0    | 99.0          | 99.0               |
|       | Lack of appetite | 1         | 1.0     | 1.0           | 100.0              |
|       | Total            | 101       | 100.0   | 100.0         |                    |

**Do you charge for TBA services?**

|       |           | Frequency | Percent | Valid Percent | Cumulative Percent |
|-------|-----------|-----------|---------|---------------|--------------------|
| Valid | Never     | 2         | 2.0     | 2.0           | 2.0                |
|       | Sometimes | 48        | 47.5    | 47.5          | 49.5               |
|       | Always    | 48        | 47.5    | 47.5          | 97.0               |
|       | Missing   | 3         | 3.0     | 3.0           | 100.0              |
|       | Total     | 101       | 100.0   | 100.0         |                    |

**TBA charges in shillings**

|       |         | Frequency | Percent | Valid Percent | Cumulative Percent |
|-------|---------|-----------|---------|---------------|--------------------|
| Valid | No      | 3         | 3.0     | 3.0           | 3.0                |
|       | Yes     | 97        | 96.0    | 96.0          | 99.0               |
|       | Missing | 1         | 1.0     | 1.0           | 100.0              |
|       | Total   | 101       | 100.0   | 100.0         |                    |

**Average TBA charge in KSH**

|         |        | Frequency | Percent | Valid Percent | Cumulative Percent |
|---------|--------|-----------|---------|---------------|--------------------|
| Valid   | 0      | 3         | 3.0     | 3.0           | 3.0                |
|         | 20     | 1         | 1.0     | 1.0           | 4.0                |
|         | 30     | 1         | 1.0     | 1.0           | 5.0                |
|         | 50     | 2         | 2.0     | 2.0           | 7.0                |
|         | 90     | 1         | 1.0     | 1.0           | 8.0                |
|         | 100    | 20        | 19.8    | 20.0          | 28.0               |
|         | 150    | 1         | 1.0     | 1.0           | 29.0               |
|         | 200    | 37        | 36.6    | 37.0          | 66.0               |
|         | 250    | 1         | 1.0     | 1.0           | 67.0               |
|         | 300    | 18        | 17.8    | 18.0          | 85.0               |
|         | 400    | 2         | 2.0     | 2.0           | 87.0               |
|         | 500    | 11        | 10.9    | 11.0          | 98.0               |
|         | 600    | 1         | 1.0     | 1.0           | 99.0               |
|         | 700    | 1         | 1.0     | 1.0           | 100.0              |
|         | Total  | 100       | 99.0    | 100.0         |                    |
| Missing | System | 1         | 1.0     |               |                    |
| Total   |        | 101       | 100.0   |               |                    |

**Accept barter for TBA services?**

|       |         | Frequency | Percent | Valid Percent | Cumulative Percent |
|-------|---------|-----------|---------|---------------|--------------------|
| Valid | No      | 80        | 79.2    | 79.2          | 79.2               |
|       | Yes     | 20        | 19.8    | 19.8          | 99.0               |
|       | Missing | 1         | 1.0     | 1.0           | 100.0              |
|       | Total   | 101       | 100.0   | 100.0         |                    |

**Other reported ways to pay for TBA services**

|                  | Frequency | Percent | Valid Percent | Cumulative Percent |
|------------------|-----------|---------|---------------|--------------------|
| Valid            | 82        | 81.2    | 81.2          | 81.2               |
| Chicken          | 14        | 13.9    | 13.9          | 95.0               |
| Chicken, maize   | 1         | 1.0     | 1.0           | 96.0               |
| Lunch            | 1         | 1.0     | 1.0           | 97.0               |
| Maize            | 1         | 1.0     | 1.0           | 98.0               |
| Maize, Cassava   | 1         | 1.0     | 1.0           | 99.0               |
| Sugar, tea leave | 1         | 1.0     | 1.0           | 100.0              |
| Total            | 101       | 100.0   | 100.0         |                    |

**Manage retained placenta: manual extraction**

|          | Frequency | Percent | Valid Percent | Cumulative Percent |
|----------|-----------|---------|---------------|--------------------|
| Valid No | 85        | 84.2    | 84.2          | 84.2               |
| Yes      | 15        | 14.9    | 14.9          | 99.0               |
| Missing  | 1         | 1.0     | 1.0           | 100.0              |
| Total    | 101       | 100.0   | 100.0         |                    |

**Manage retained placenta: uterine massage**

|          | Frequency | Percent | Valid Percent | Cumulative Percent |
|----------|-----------|---------|---------------|--------------------|
| Valid No | 53        | 52.5    | 52.5          | 52.5               |
| Yes      | 47        | 46.5    | 46.5          | 99.0               |
| Missing  | 1         | 1.0     | 1.0           | 100.0              |
| Total    | 101       | 100.0   | 100.0         |                    |

**Manage retained placenta: Oxytocin**

|          | Frequency | Percent | Valid Percent | Cumulative Percent |
|----------|-----------|---------|---------------|--------------------|
| Valid No | 94        | 93.1    | 93.1          | 93.1               |
| Yes      | 6         | 5.9     | 5.9           | 99.0               |
| Missing  | 1         | 1.0     | 1.0           | 100.0              |
| Total    | 101       | 100.0   | 100.0         |                    |



**Manage retained placenta: refer to health facility**

|          | Frequency | Percent | Valid Percent | Cumulative Percent |
|----------|-----------|---------|---------------|--------------------|
| Valid No | 39        | 38.6    | 38.6          | 38.6               |
| Yes      | 61        | 60.4    | 60.4          | 99.0               |
| Missing  | 1         | 1.0     | 1.0           | 100.0              |
| Total    | 101       | 100.0   | 100.0         |                    |

**Manage retained placenta: other reported**

|          | Frequency | Percent | Valid Percent | Cumulative Percent |
|----------|-----------|---------|---------------|--------------------|
| Valid No | 84        | 83.2    | 83.2          | 83.2               |
| Yes      | 16        | 15.8    | 15.8          | 99.0               |
| Missing  | 1         | 1.0     | 1.0           | 100.0              |
| Total    | 101       | 100.0   | 100.0         |                    |

**Other methods manage retained placenta**

|                                                   | Frequency | Percent | Valid Percent | Cumulative Percent |
|---------------------------------------------------|-----------|---------|---------------|--------------------|
| Valid                                             | 85        | 84.2    | 84.2          | 84.2               |
| Cooking stick down throat                         | 2         | 2.0     | 2.0           | 86.1               |
| Cooking stick or chain of beads down mom's throat | 1         | 1.0     | 1.0           | 87.1               |
| Give mother hot porridge                          | 1         | 1.0     | 1.0           | 88.1               |
| Herbal oxytocin                                   | 2         | 2.0     | 2.0           | 90.1               |
| Herbs                                             | 6         | 5.9     | 5.9           | 96.0               |
| Lantana leaves                                    | 1         | 1.0     | 1.0           | 97.0               |
| Nipple massage                                    | 1         | 1.0     | 1.0           | 98.0               |
| Put beads in mom's throat; rubs a stone on spine  | 1         | 1.0     | 1.0           | 99.0               |
| Rub grinding stone on mother's back               | 1         | 1.0     | 1.0           | 100.0              |
| Total                                             | 101       | 100.0   | 100.0         |                    |

**Report outcomes to elder/chief?**

|          | Frequency | Percent | Valid Percent | Cumulative Percent |
|----------|-----------|---------|---------------|--------------------|
| Valid No | 13        | 12.9    | 12.9          | 12.9               |
| Yes      | 84        | 83.2    | 83.2          | 96.0               |
| Missing  | 4         | 4.0     | 4.0           | 100.0              |
| Total    | 101       | 100.0   | 100.0         |                    |

**Ever referred to health facility for obstructed labor**

|          | Frequency | Percent | Valid Percent | Cumulative Percent |
|----------|-----------|---------|---------------|--------------------|
| Valid No | 10        | 9.9     | 9.9           | 9.9                |
| Yes      | 91        | 90.1    | 90.1          | 100.0              |
| Total    | 101       | 100.0   | 100.0         |                    |

**Ever referred to health facility for prolonged labor**

|          | Frequency | Percent | Valid Percent | Cumulative Percent |
|----------|-----------|---------|---------------|--------------------|
| Valid No | 13        | 12.9    | 12.9          | 12.9               |
| Yes      | 88        | 87.1    | 87.1          | 100.0              |
| Total    | 101       | 100.0   | 100.0         |                    |

**Ever referred to health facility for bleeding**

|          | Frequency | Percent | Valid Percent | Cumulative Percent |
|----------|-----------|---------|---------------|--------------------|
| Valid No | 7         | 6.9     | 6.9           | 6.9                |
| Yes      | 94        | 93.1    | 93.1          | 100.0              |
| Total    | 101       | 100.0   | 100.0         |                    |

**Ever referred to health facility for retained placenta**

|          | Frequency | Percent | Valid Percent | Cumulative Percent |
|----------|-----------|---------|---------------|--------------------|
| Valid No | 16        | 15.8    | 15.8          | 15.8               |
| Yes      | 85        | 84.2    | 84.2          | 100.0              |
| Total    | 101       | 100.0   | 100.0         |                    |

**Ever referred to health facility for prolapsed cord**

|          | Frequency | Percent | Valid Percent | Cumulative Percent |
|----------|-----------|---------|---------------|--------------------|
| Valid No | 9         | 8.9     | 8.9           | 8.9                |
| Yes      | 92        | 91.1    | 91.1          | 100.0              |
| Total    | 101       | 100.0   | 100.0         |                    |

**Ever referred to health facility for prematurity**

|          | Frequency | Percent | Valid Percent | Cumulative Percent |
|----------|-----------|---------|---------------|--------------------|
| Valid No | 20        | 19.8    | 19.8          | 19.8               |
| Yes      | 81        | 80.2    | 80.2          | 100.0              |
| Total    | 101       | 100.0   | 100.0         |                    |

**Ever referred to health facility for no fetal heart rate**

|       |       | Frequency | Percent | Valid Percent | Cumulative Percent |
|-------|-------|-----------|---------|---------------|--------------------|
| Valid | No    | 45        | 44.6    | 44.6          | 44.6               |
|       | Yes   | 56        | 55.4    | 55.4          | 100.0              |
|       | Total | 101       | 100.0   | 100.0         |                    |

**Ever referred to health facility for mom hypertension**

|       |       | Frequency | Percent | Valid Percent | Cumulative Percent |
|-------|-------|-----------|---------|---------------|--------------------|
| Valid | No    | 77        | 76.2    | 76.2          | 76.2               |
|       | Yes   | 24        | 23.8    | 23.8          | 100.0              |
|       | Total | 101       | 100.0   | 100.0         |                    |

**Ever referred to health facility for mom seizures**

|       |       | Frequency | Percent | Valid Percent | Cumulative Percent |
|-------|-------|-----------|---------|---------------|--------------------|
| Valid | No    | 19        | 18.8    | 18.8          | 18.8               |
|       | Yes   | 82        | 81.2    | 81.2          | 100.0              |
|       | Total | 101       | 100.0   | 100.0         |                    |

**Ever referred to health facility for breech**

|       |       | Frequency | Percent | Valid Percent | Cumulative Percent |
|-------|-------|-----------|---------|---------------|--------------------|
| Valid | No    | 30        | 29.7    | 29.7          | 29.7               |
|       | Yes   | 71        | 70.3    | 70.3          | 100.0              |
|       | Total | 101       | 100.0   | 100.0         |                    |

**Ever refer to health facility for baby not breathe**

|       |       | Frequency | Percent | Valid Percent | Cumulative Percent |
|-------|-------|-----------|---------|---------------|--------------------|
| Valid | No    | 19        | 18.8    | 18.8          | 18.8               |
|       | Yes   | 82        | 81.2    | 81.2          | 100.0              |
|       | Total | 101       | 100.0   | 100.0         |                    |

**Ever refer for other conditions**

|       |       | Frequency | Percent | Valid Percent | Cumulative Percent |
|-------|-------|-----------|---------|---------------|--------------------|
| Valid | No    | 87        | 86.1    | 86.1          | 86.1               |
|       | Yes   | 14        | 13.9    | 13.9          | 100.0              |
|       | Total | 101       | 100.0   | 100.0         |                    |

**Other reported referral conditions**

|                | Frequency | Percent | Valid Percent | Cumulative Percent |
|----------------|-----------|---------|---------------|--------------------|
| Valid          | 96        | 95.0    | 95.0          | 95.0               |
| Big baby       | 1         | 1.0     | 1.0           | 96.0               |
| Goiter         | 1         | 1.0     | 1.0           | 97.0               |
| Unable to push | 1         | 1.0     | 1.0           | 98.0               |
| Yellow baby    | 2         | 2.0     | 2.0           | 100.0              |
| Total          | 101       | 100.0   | 100.0         |                    |

**HCFriendly**

|                 | Frequency | Percent | Valid Percent | Cumulative Percent |
|-----------------|-----------|---------|---------------|--------------------|
| Valid Very Poor | 7         | 6.9     | 7.0           | 7.0                |
| Poor            | 5         | 5.0     | 5.0           | 12.0               |
| Fair            | 17        | 16.8    | 17.0          | 29.0               |
| Good            | 69        | 68.3    | 69.0          | 98.0               |
| Very Good       | 2         | 2.0     | 2.0           | 100.0              |
| Total           | 100       | 99.0    | 100.0         |                    |
| Missing System  | 1         | 1.0     |               |                    |
| Total           | 101       | 100.0   |               |                    |

**HCCommunicate**

|                 | Frequency | Percent | Valid Percent | Cumulative Percent |
|-----------------|-----------|---------|---------------|--------------------|
| Valid Very poor | 7         | 6.9     | 6.9           | 6.9                |
| Poor            | 5         | 5.0     | 5.0           | 11.9               |
| Fair            | 18        | 17.8    | 17.8          | 29.7               |
| Good            | 68        | 67.3    | 67.3          | 97.0               |
| Very Good       | 3         | 3.0     | 3.0           | 100.0              |
| Total           | 101       | 100.0   | 100.0         |                    |

**HCFamInteract**

|                 | Frequency | Percent | Valid Percent | Cumulative Percent |
|-----------------|-----------|---------|---------------|--------------------|
| Valid Very poor | 7         | 6.9     | 6.9           | 6.9                |
| Poor            | 5         | 5.0     | 5.0           | 11.9               |
| Fair            | 19        | 18.8    | 18.8          | 30.7               |
| Good            | 68        | 67.3    | 67.3          | 98.0               |
| Very Good       | 2         | 2.0     | 2.0           | 100.0              |
| Total           | 101       | 100.0   | 100.0         |                    |

```
FREQUENCIES VARIABLES=GNCluster TradRXEver TradRXObsLabor TradRxPlacenta TradR
xBleed TradRxFever TradRxOther TradRxOtherText PayforTBA TBAPayKSH KSHCost TBA
PayBarter TBAPayOther HCFamInteract HCFriendly HCCommunicate
  /ORDER=ANALYSIS.
GET
  FILE='C:\Documents and Settings\shbucher\Desktop\Old PC\shbucher\Global Netw
ork Kenya-specific research\TBA survey\SPSS data analysis\CLEAN_Kenya only CBA
survey data.sav'.
DATASET NAME DataSet1 WINDOW=FRONT.
```
